# Supplementary material for: A PTEN variant uncouples longevity from impaired fitness in Caenorhabditis elegans with reduced insulin/IGF-1 signaling
Source: PubMed Central journal article supplement (PMC8463539; doi:10.1038/s41467-021-25920-w), 2021-09-24
Supplement: 41467_2021_25920_MOESM1_ESM.pdf [file 41467_2021_25920_MOESM1_ESM.pdf]

# 1 Supporting Information

## 2 Supplementary Figures

### Supplementary Figure 1

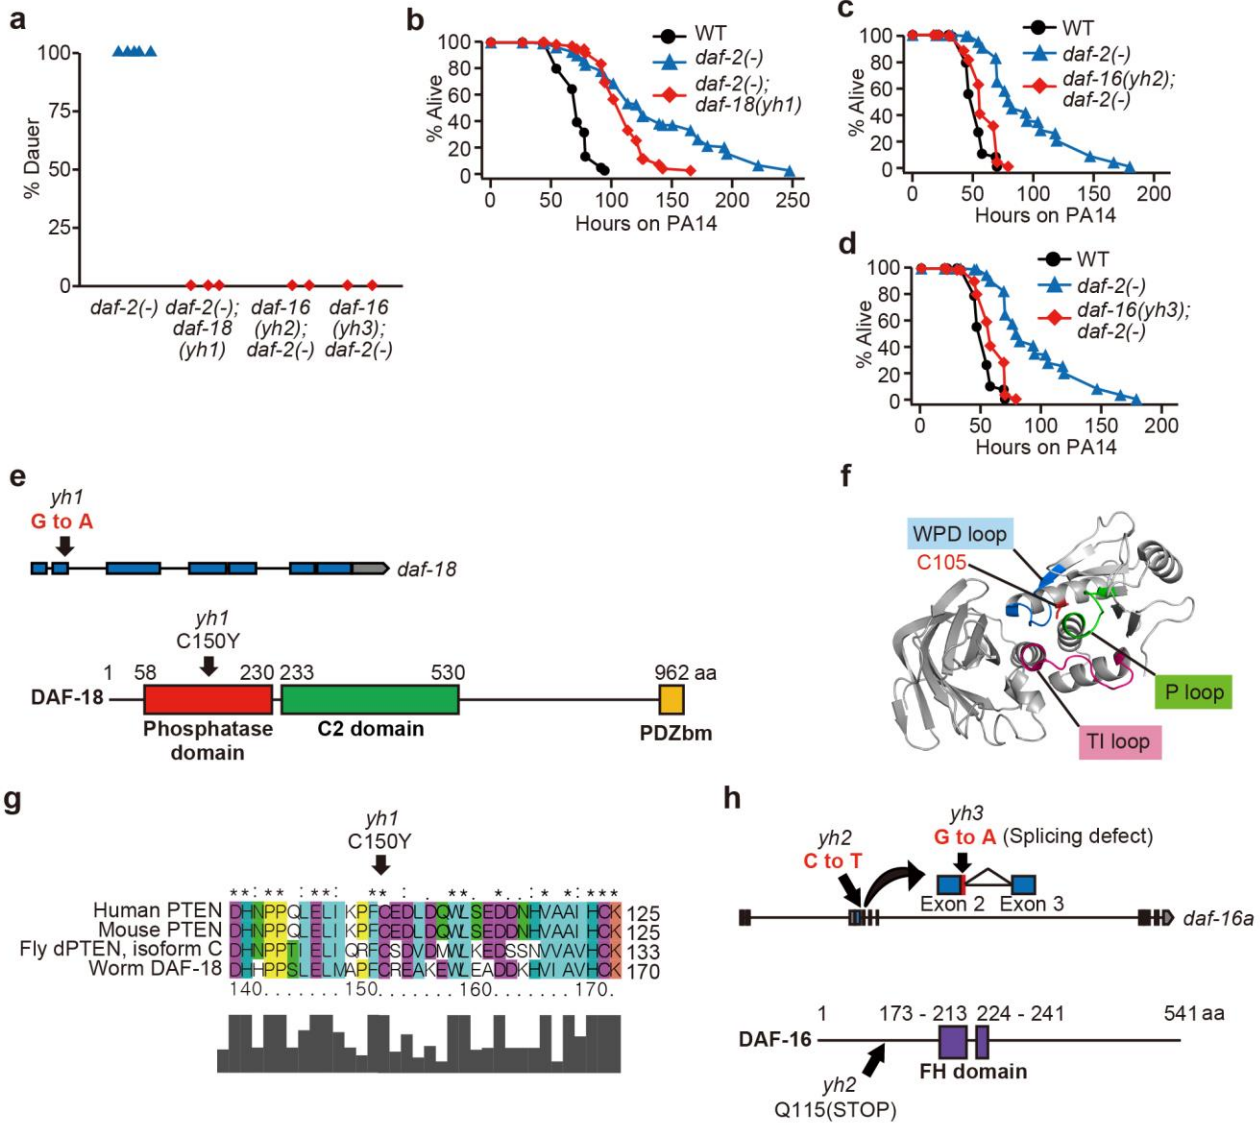

### 3 Supplementary Fig. 1: Identification of mutations that suppress dauer phenotypes

4 with small effects on immunity in *daf-2(e1370)* mutants. (a) Percentage of 25°C

5 dauer formation of *daf-2(e1370); daf-18(yh1)* [*daf-2(-); daf-18(yh1)*], *daf-16(yh2); daf-*

6 *2(-)*, and *daf-16(yh3); daf-2(-)* animals, which were identified from our mutagenesis

7 screen, and *daf-2(-)* animals that were used as a control ( $n \geq 267$  for each condition, the  
8 assays were performed at least twice). **(b-d)** Survival curves of *daf-2(-); daf-18(yh1)* **(b)**,  
9 *daf-16(yh2); daf-2(-)* **(c)**, and *daf-16(yh3); daf-2(-)* **(d)** mutants on PA14 compared with  
10 *daf-2(-)* mutant and wild-type (WT) worms ( $n = 180$  for each condition). **(e-h)** Molecular  
11 natures of *yh1*, *yh2*, and *yh3* alleles identified from our mutagenesis screen (See  
12 Supplementary Table 1 for details). **(e)** The locus of the *yh1* allele in *daf-18* and the  
13 corresponding change in *C. elegans* DAF-18/PTEN protein. *yh1* mutation changes G to  
14 A at the 2<sup>nd</sup> exon of *daf-18*, which causes the cysteine to tyrosine change at the location  
15 of 150<sup>th</sup> amino acid in DAF-18/PTEN. Amino acid (aa) numbers are indicated at the top  
16 of the protein domains. Phosphatase domain (58 aa – 230 aa), C2 domain (233 aa –  
17 530 aa), and PDZ-binding motif (PDZbm) are indicated as boxes. **(f)** Three-dimensional  
18 structure of human PTEN<sup>1</sup>. C105 resides in a region between two catalytic loops, WPD  
19 loop and a highly-conserved core P loop. **(g)** Alignment of amino acid sequences of  
20 human PTEN, mouse PTEN, *Drosophila* (fly) dPTEN isoform C, and *C. elegans* (worm)  
21 DAF-18. A gray histogram represents the conservation of the sequences. **(h)** The loci of  
22 *yh2* and *yh3* alleles in *daf-16* isoform a [*daf-16a*] and the corresponding changes in *C.*  
23 *elegans* DAF-16/FOXO protein. *yh2* causes a nonsense mutation by a C to T transition  
24 at the 2<sup>nd</sup> exon of *daf-16a*, resulting in premature termination at the 115<sup>th</sup> glutamine. *yh3*  
25 causes a G to A transition at the 5' splicing site of intron 2, resulting in a predicted pre-  
26 mRNA splicing defect, leading to the acquisition of a premature stop codon. The  
27 structural analysis showed that *daf-16(yh2)* and *daf-16(yh3)* mutations may prevent the  
28 translation of the forkhead (FH) domain (173 aa - 213 aa and 224 aa - 241 aa) of DAF-  
29 16/FOXO due to generation of premature stop codons. See Supplementary Dataset 2

30 and 3 for additional repeats and statistical analysis for the survival and the dauer assay  
31 data shown in this figure. See also Source Data for data points used for the derivation of  
32 data.

## Supplementary Figure 2

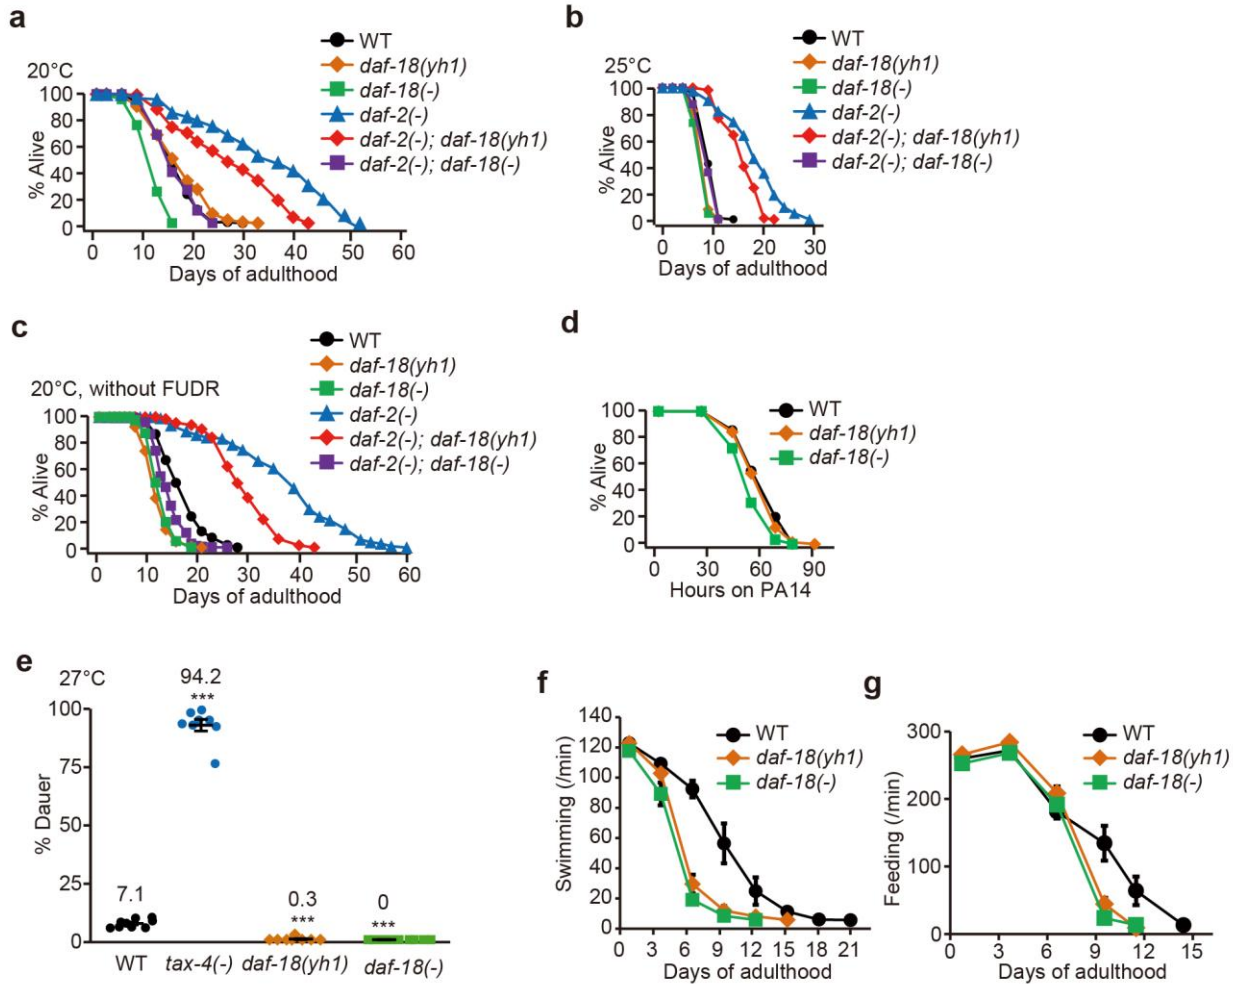

33 **Supplementary Fig. 2: *daf-18(yh1)* decreases pathogen resistance, lifespan, and**  
 34 **health span in *daf-2(-)* and wild-type animals. (a-c)** The effects of *daf-18(yh1)* and  
 35 *daf-18(nr2037)* [*daf-18(-)*] on the lifespan of wild-type (WT) and *daf-2(e1370)* [*daf-2(-)*]  
 36 animals at 20°C (**a**), at 25°C (**b**), and at 20°C without FUDR treatment (**c**) (n ≥ 225 for  
 37 each condition). *daf-18(yh1)* substantially decreased the lifespan of WT animals with an  
 38 extent similar to that caused by *daf-18(-)* at 20°C (four out of six trials). The lifespan  
 39 curves of WT, *daf-2(-)*, *daf-2(-); daf-18(yh1)*, and *daf-2(-); daf-18(-)* shown in panel **a** are  
 40 the same experimental sets shown in Fig. 1i, and those in **c** are the same experimental  
 41 sets shown in Supplementary Fig. 10b and Fig. 6b. (**d-g**) The effects of *daf-18(yh1)* and

42 *daf-18(-)* on pathogen resistance (n = 180 for each condition) (**d**), dauer formation at  
43 27°C (n ≥ 790 for each condition, from at least eight trials) (**e**), swimming span (n = 10  
44 for each condition, from one trial) (**f**), and feeding span (n = 10 for each condition, from  
45 one trial) (**g**). The survival of *daf-18(yh1)* animals under PA14 infection was similar to  
46 that of WT worms, whereas *daf-18(-)* worms displayed reduced survival (**d**). Both *daf-*  
47 *18(yh1)* (0.3%) and *daf-18(-)* (0%) mutations substantially suppressed dauer  
48 phenotypes at 27°C; WT animals displayed 7.1% of dauers at 27°C, and *tax-4(p678)*  
49 [*tax-4(-)*] animals, which display a constitutive dauer phenotype at 27°C<sup>2</sup>, was used as a  
50 positive control (**e**). In addition, *daf-18(yh1)* and *daf-18(-)* mutations similarly reduced  
51 the swimming (motility) and feeding spans (**f,g**). Error bars indicate the standard error of  
52 mean (s.e.m., \*\*\**p* < 0.001, two-tailed Student's *t*-test relative to WT). See  
53 Supplementary Dataset 2, 3, and 4 for additional repeats and statistical analysis for the  
54 survival, dauer, and health span assay data shown in this figure. See also Source Data  
55 for data points used for the derivation of data.

### Supplementary Figure 3

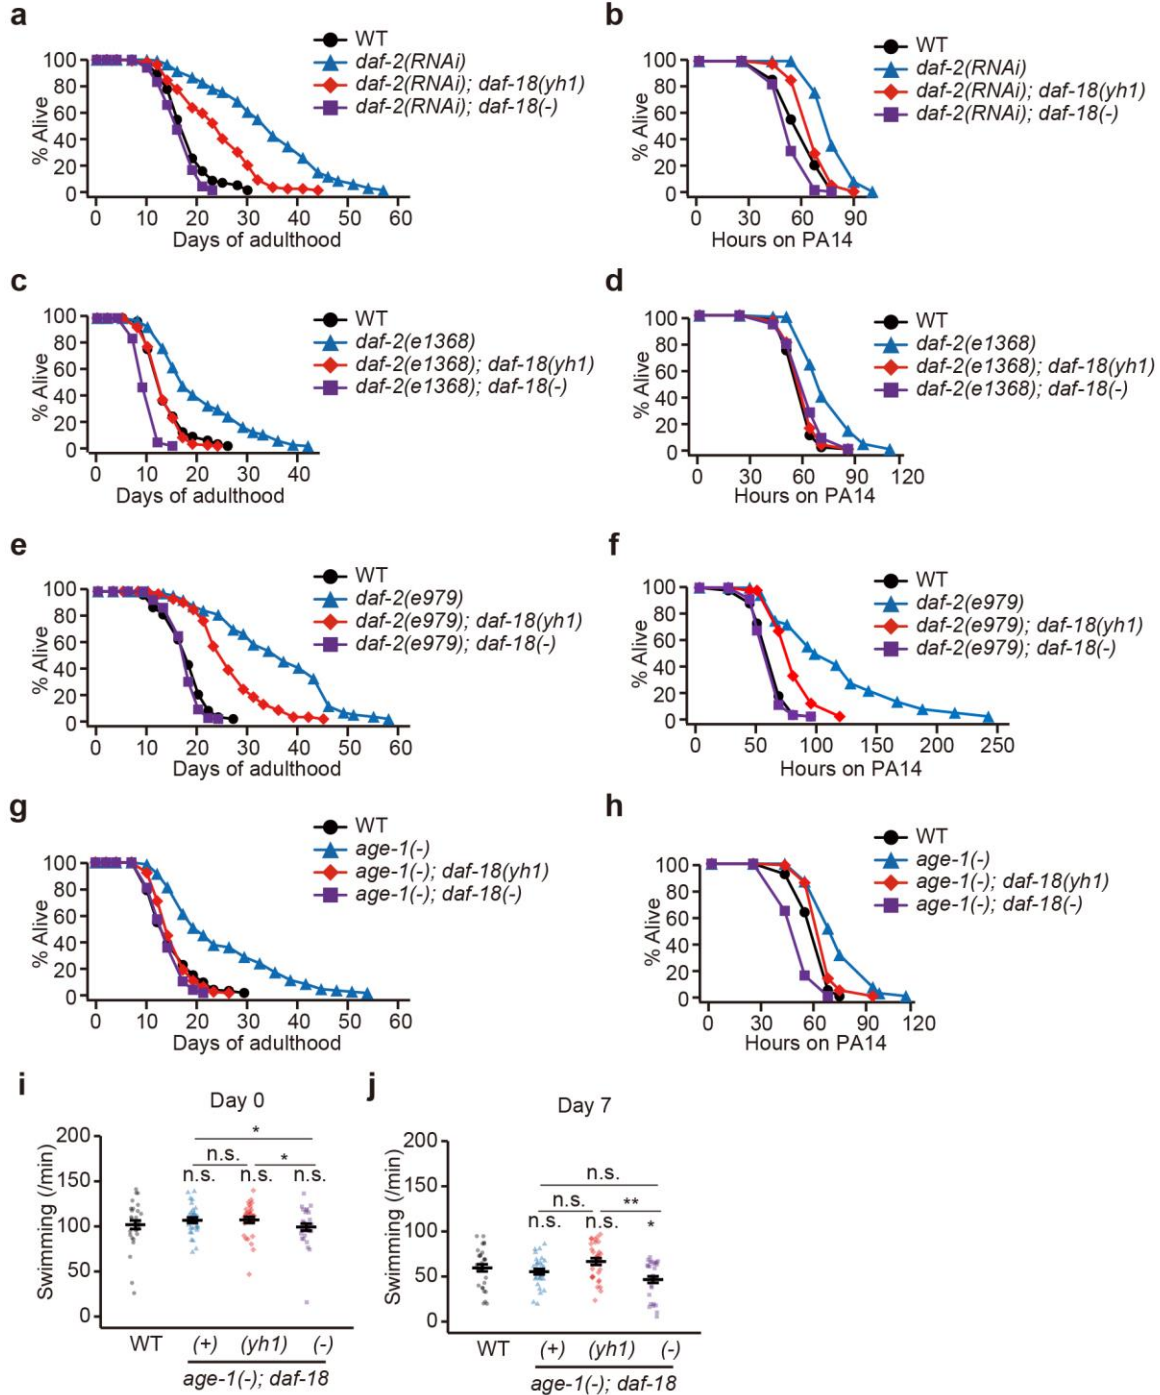

56 **Supplementary Fig. 3: *daf-18(yh1)* retains lifespan and pathogen resistance in**  
 57 **worms with reduced IIS in multiple conditions. (a-h) The effects of *daf-18(yh1)* and**  
 58 ***daf-18(nr2037)* [*daf-18(-)*] on lifespan at 20°C (n ≥ 270 for each condition; n = 156 for**

59 *daf-2(e979)* animals) and pathogen resistance (n = 180 for each condition; n = 35 for  
60 *daf-2(e979)* animals) of *daf-2(RNAi)* (a,b), *daf-2(e1368)* (c,d), *daf-2(e979)* (e,f), and  
61 *age-1(hx546)* [*age-1(-)*] (g,h) animals. (i,j) Swimming rate (n = 30 for each condition,  
62 body bends per minute in liquid measured from three independent trials) of day 0 (i) and  
63 day 7 adult (j) wild-type (WT), *age-1(-); daf-18(+)*, *age-1(-); daf-18(yh1)*, and *age-1(-);*  
64 *daf-18(-)* animals. Error bars indicate the standard error of mean (s.e.m., \**p* < 0.05, \*\**p*  
65 < 0.01, n.s.: not significant, two-tailed Student's *t*-test relative to WT unless otherwise  
66 noted). See Supplementary Dataset 2 and 4 for additional repeats and statistical  
67 analysis for the survival assay and health span assay data shown in this figure. See  
68 also Source Data for data points used for the derivation of data.

## Supplementary Figure 4

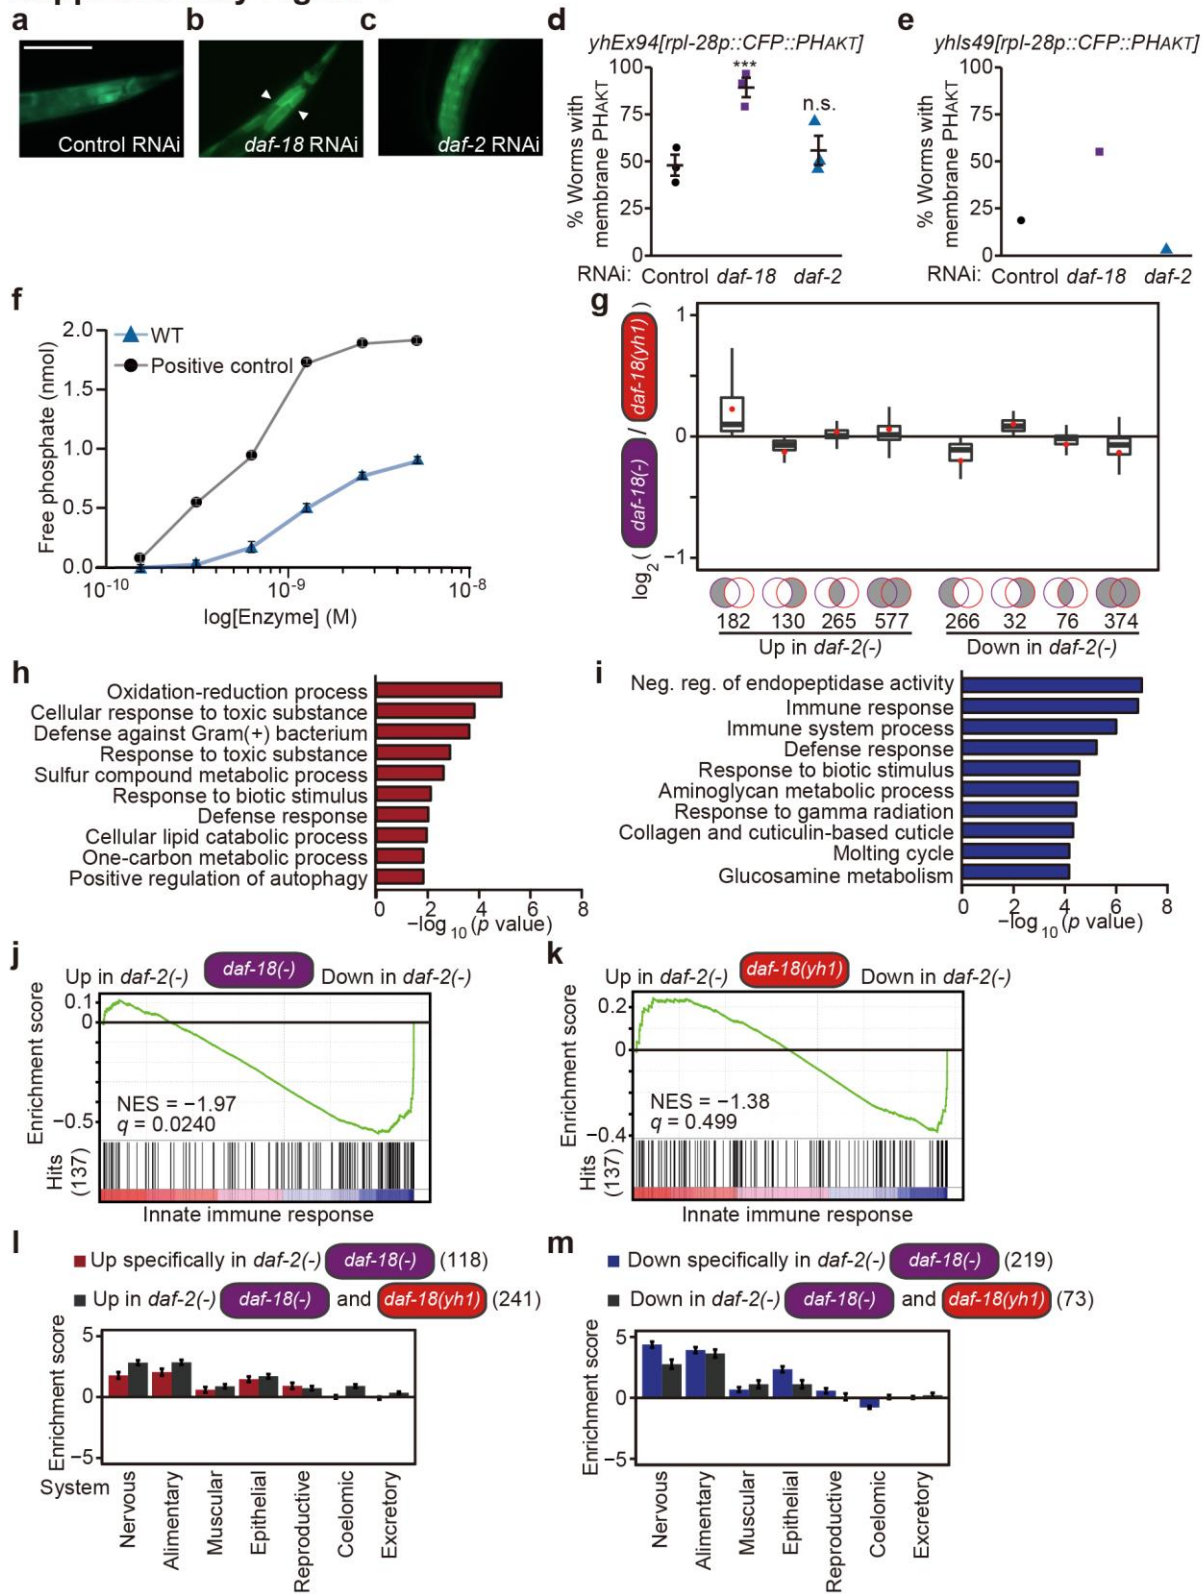



70 **on phosphatase activity and various downstream targets in reduced IIS**  
71 **conditions. (a-c)** Subcellular localization of mouse PH<sub>AKT</sub> for monitoring PIP<sub>3</sub> levels in  
72 *C. elegans*. Representative images of *rpl-28p::CFP::PH<sub>AKT</sub>*-expressing animals treated  
73 with control RNAi **(a)**, *daf-18* RNAi **(b)**, or *daf-2* RNAi **(c)**. *rpl-28p* is a ubiquitous *rpl-28*  
74 (ribosomal protein large subunit 28) gene promoter. Worms expressing *CFP::PH<sub>AKT</sub>* as  
75 an extrachromosomal array, *yhEx94[rpl-28p::CFP::PH<sub>AKT</sub>, odr-1p::RFP]*. Scale bar: 50  
76  $\mu$ m. Arrowhead: membrane CFP::PH<sub>AKT</sub>. **(d)** Quantification of panels **a-c** ( $n > 10$  for  
77 each condition, from three independent trials). Error bars indicate the standard error of  
78 mean (s.e.m., \*\*\* $p < 0.001$ , n.s.: not significant, two-tailed Student's *t*-test relative to  
79 WT). **(e)** Quantification of fluorescent protein levels of integrated CFP::PH<sub>AKT</sub> worms,  
80 *yhls49[rpl-28p::CFP::PH<sub>AKT</sub>; odr-1p::RFP]* ( $n > 10$  for each condition, from one trial). **(f)**  
81 Dose-dependent changes in the protein phosphatase activity of human recombinant  
82 PTEN (WT) and protein tyrosine phosphatase 1B (PTP1B, positive control). The  
83 indicated amounts of recombinant proteins were tested for the protein phosphatase  
84 assay ( $N = 3$ ). Note that the same dose-dependent protein phosphatase activity curve of  
85 WT is shown in Fig. 3h as well. **(g)** Overall magnitudes of gene expression changes  
86 caused by *daf-18(yh1)* were smaller than those by *daf-18(nr2037) [daf-18(-)]* in *daf-*  
87 *2(e1370) [daf-2(-)]* mutants. Venn diagrams with gray area display overlaps between  
88 differentially expressed genes. Box plots represent five-number summaries of  
89 expression changes of genes that are included in the gray areas in the Venn diagrams.  
90 Red dots in the box plots display mean expression changes. **(h,i)** Overrepresented  
91 gene ontology (GO) terms of the genes that were upregulated **(h)** and downregulated **(i)**  
92 in *daf-2(-)* mutants compared specifically with *daf-2(-); daf-18(-)* animals but not with

93 *daf-2(-); daf-18(yh1)* worms. *p* values were calculated by using hypergeometric test.  
94 **(j,k)** Innate immune response genes (curated as a GO term) were significantly induced  
95 by *daf-18(-)* **(j)**, but not by *daf-18(yh1)* **(k)**, in the *daf-2(-)* mutant background. NES:  
96 normalized enrichment score. *q* values were obtained by calculating the false discovery  
97 rate corresponding to each NES. **(l)** Tissue enrichment analysis of genes upregulated in  
98 *daf-2(-)* animals compared specifically with *daf-2(-); daf-18(-)* animals but not with *daf-*  
99 *2(-); daf-18(yh1)* animals, or generally compared with both *daf-2(-); daf-18(-)* and *daf-*  
100 *2(-); daf-18(yh1)* animals. **(m)** Tissue enrichment analysis of genes downregulated in  
101 *daf-2(-)* animals compared specifically with *daf-2(-); daf-18(-)* animals but not with *daf-*  
102 *2(-); daf-18(yh1)* animals, or generally compared with both *daf-2(-); daf-18(-)* and *daf-*  
103 *2(-); daf-18(yh1)* animals. See Source Data for data points used for the derivation of  
104 data.

## Supplementary Figure 5

**a**

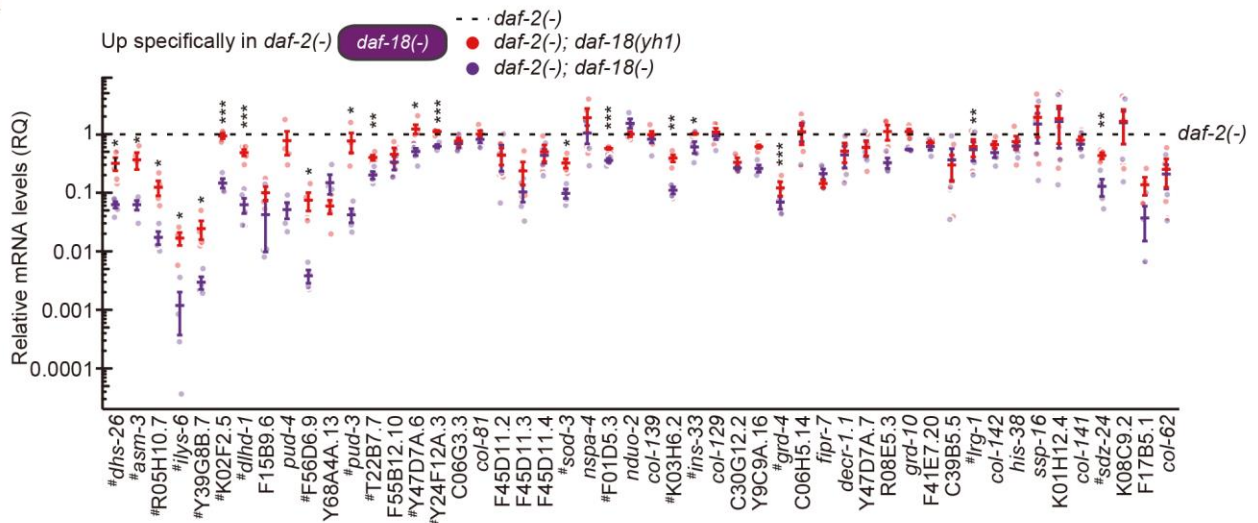

**b**

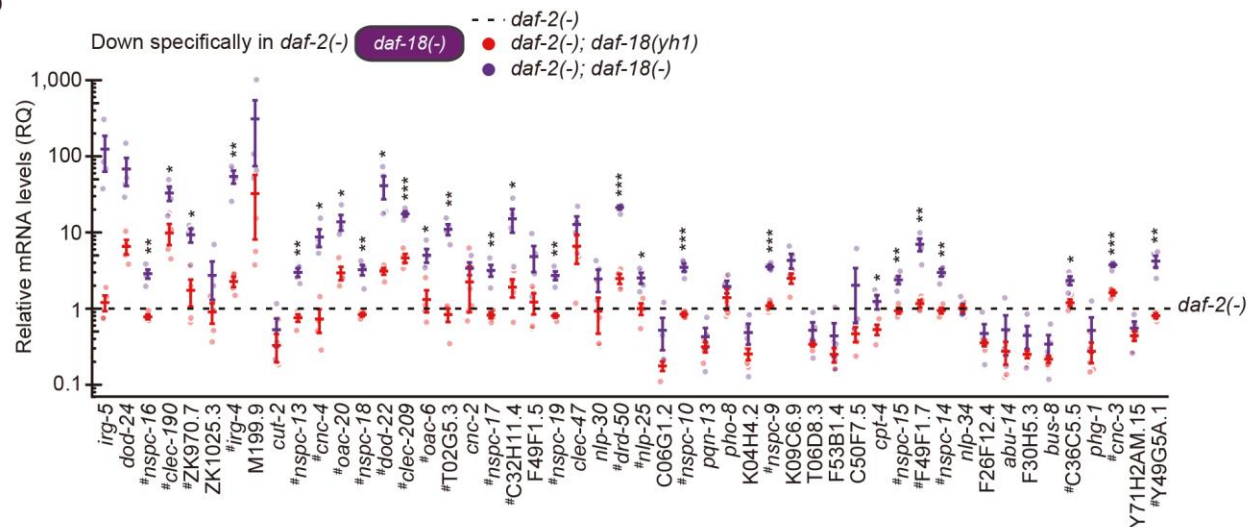

105 **Supplementary Fig. 5: Confirmation of genes whose expression was greatly**  
 106 **affected by *daf-18(-)* compared with that by *daf-18(yh1)* in *daf-2(-)* mutants.**

107 Relative mRNA levels of selected genes whose expression was highly affected by *daf-*  
 108 *18(nr2037)* [*daf-18(-)*] compared with that by *daf-18(yh1)* in *daf-2(e1370)* [*daf-2(-)*] using  
 109 quantitative RT-PCR (N ≥ 4). (a) Among the top-ranked 50 genes that were upregulated  
 110 in *daf-2(-)* animals compared with *daf-2(-); daf-18(-)* (fold change > 2, Benjamini and  
 111 Hochberg (BH)-adjusted *p* value < 0.05), but marginally with *daf-2(-); daf-18(yh1)* worms

112 (fold change < 2), 19 genes (marked as #) displayed the same tendency as RNA-seq  
113 data by using qRT-PCR. **(b)** Among the 50 genes that were robustly downregulated in  
114 *daf-2(-)* animals compared with *daf-2(-); daf-18(-)* worms (fold change > 2, BH-adjusted  
115 *p* value < 0.05) but slightly with *daf-2(-); daf-18(yh1)* animals (fold change < 2), 25  
116 genes (marked as #) displayed the same tendency as RNA-seq data by using qRT-PCR.  
117 #: *daf-2(-)* vs. *daf-2(-); daf-18(-)* and *daf-2(-); daf-18(yh1)* vs. *daf-2(-); daf-18(-)*, *p* < 0.05.  
118 RQ: relative quantity. Black dotted lines indicate the RQ value of *daf-2(-)* animals set as  
119 1. Error bars indicate the standard error of mean (s.e.m., \**p* < 0.05, \*\**p* < 0.01, \*\*\**p* <  
120 0.001, two-tailed Student's *t*-test). See Supplementary Dataset 5 for the details of  
121 primer sequences. See also Source Data for data points used for the derivation of data.

## Supplementary Figure 6

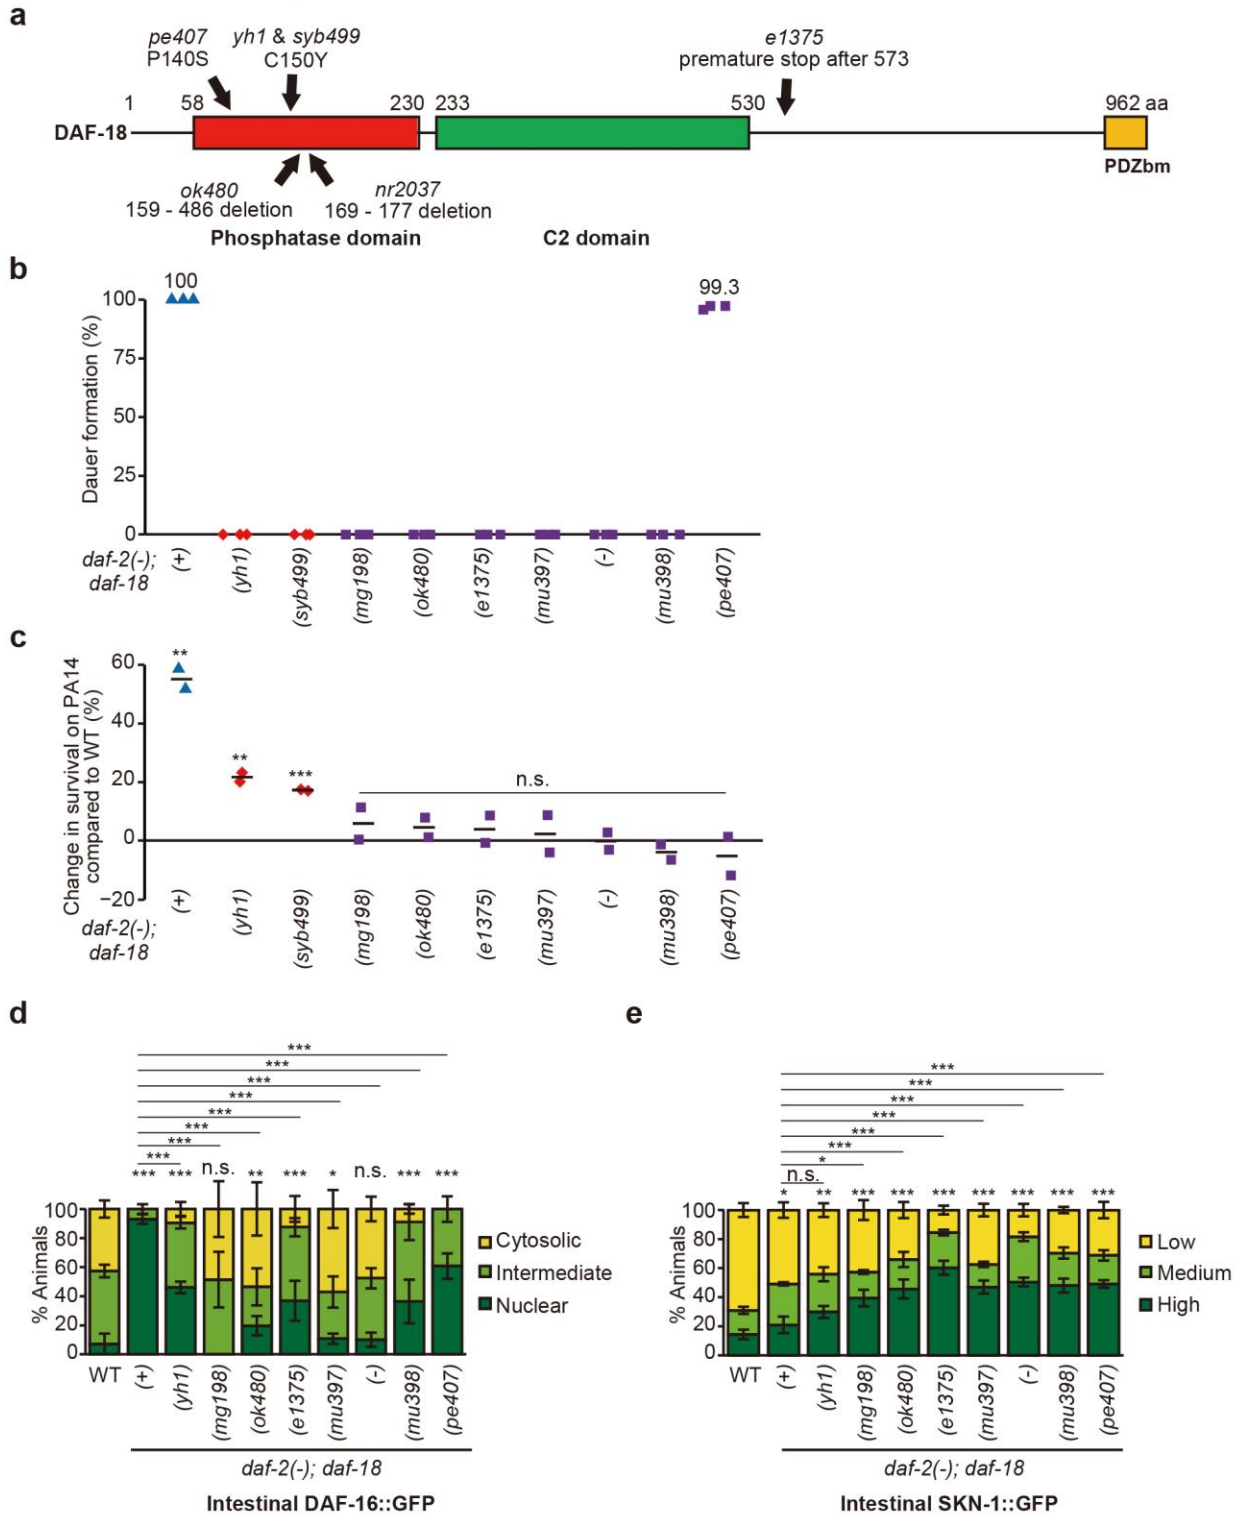

123 **formation, immunity, and the subcellular localization of DAF-16/FOXO and SKN-**  
124 **1/NRF2 in *daf-2(-)* mutants. (a)** Locations of *daf-18* hypomorphs that were used for the  
125 experiments in the current work<sup>3-10</sup>. *pe407* was isolated from the mutagenesis screen as  
126 a suppressor that restores the plasticity of salt chemotaxis in *casy-1(tm718)* mutant  
127 backgrounds<sup>10</sup>. *pe407* causes P140S change in the phosphatase domain of DAF-  
128 18/PTEN. *yh1* (this study) and *syb499* (CRISPR knock-in version of *yh1*) results in  
129 C150Y change, at the phosphatase domain of DAF-18. Amino acid (aa) numbers are  
130 indicated at the top of the protein domains. Phosphatase domain, C2 domain, and PDZ-  
131 binding motif (PDZbm) are indicated as boxes. *nr2037* (169 aa – 177 aa deletion)<sup>3,4</sup> and  
132 *ok480* (159 aa – 486 aa deletion)<sup>7</sup> are deletion alleles of *daf-18*, and *e1375* has a 30 bp  
133 insertion that introduces a premature stop codon at 573 aa<sup>5,8</sup>. **(b,c)** The effects of  
134 various *daf-18* mutant alleles on dauer formation at 25°C (n ≥ 287 for each condition,  
135 from three to five independent trials; the assays were performed 96 hrs after eggs were  
136 placed) **(b)** and the survival of worms on the pathogen (PA14) using a big-lawn assay (n  
137 = 180 for each condition, from two independent trials) **(c)** in the *daf-2(-)* background.  
138 Wild-type (WT), *daf-2(e1370)* [*daf-2(-)*], *daf-2(-); daf-18(yh1)*, *daf-2(-); daf-18(syb499)*,  
139 *daf-2(-); daf-18(mg198)*, *daf-2(-); daf-18(ok480)*, *daf-2(-); daf-18(e1375)*, *daf-2(-); daf-*  
140 *18(mu397)*, *daf-2(-); daf-18(nr2037)* [*daf-18(-)*], *daf-2(-); daf-18(mu398)*, and *daf-2(-);*  
141 *daf-18(pe407)* animals were examined. Consistent with previous reports<sup>5,8,11</sup>, *daf-2(-);*  
142 *daf-18(e1375)* animals developed slowly but eventually became adults at the time dauer  
143 formation was assayed. Horizontal lines in panel **c** represent mean values (\*\**p* < 0.01,  
144 \*\*\**p* < 0.001, n.s.: not significant, two-tailed Student's *t*-test relative to WT). **(d,e)** The  
145 effects of various *daf-18* mutant alleles on the subcellular localization of DAF-16::GFP

146 and SKN-1::GFP in *daf-2(-)* mutants. **(d)** Quantification of the subcellular localization of  
147 DAF-16::GFP in the intestines of indicated strains. Cytosolic: predominant cytosolic  
148 localization, intermediate: partial nuclear localization, nuclear: predominant nuclear  
149 localization ( $n \geq 28$  for each condition, from four to seven independent trials). **(e)**  
150 Quantification of the subcellular localization of SKN-1::GFP in the intestinal cells of  
151 indicated strains. Low: very dim GFP in the nuclei, medium:  $< 50\%$  of the nuclei with  
152 SKN-1::GFP, high:  $> 50\%$  of the nuclei with SKN-1::GFP ( $n \geq 144$  for each condition,  
153 from four to eight independent trials). The quantification data of DAF-16::GFP  
154 subcellular localization in WT, *daf-2(-)*, *daf-2(-); daf-18(yh1)*, and *daf-2(-); daf-18(-)*  
155 animals shown in panel **d** are the same experimental sets shown in Fig. 5g, and those  
156 in panel **e** are the same experimental sets shown in Fig. 5i. Error bars represent the  
157 standard error of mean (s.e.m.,  $*p < 0.05$ ,  $**p < 0.01$ ,  $***p < 0.001$ , n.s.: not significant,  
158 Chi-squared test). See Supplementary Dataset 2 and 3 for additional repeats and  
159 statistical analysis for the survival and dauer assay data shown in this figure. See also  
160 Source Data for data points used for the derivation of data.

## Supplementary Figure 7

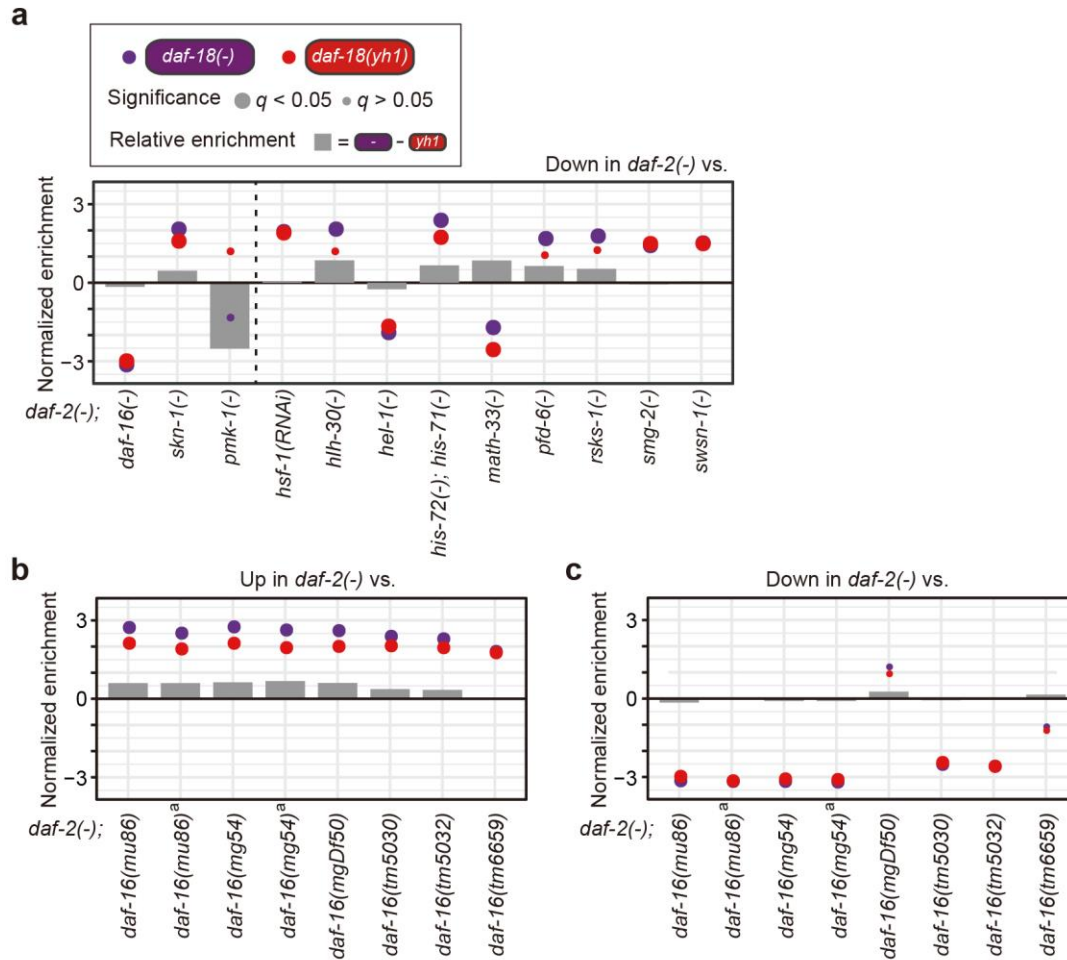

161 **Supplementary Fig. 7: Differential effects of *daf-18(yh1)* and *daf-18(-)* on the**  
 162 **expression of various target genes in worms with reduced insulin/IGF-1 signaling.**  
 163 (a-c) Normalized enrichment of gene expression changes in *daf-2(e1370)* [*daf-2(-)*]  
 164 mutants compared to *daf-2(-); daf-18(yh1)* or *daf-2(-); daf-18(nr2037)* [*daf-18(-)*]  
 165 mutants. (a) Genes downregulated in *daf-2(-)* animals compared to various lifespan  
 166 mutants in the *daf-2(-)* background were used for the analysis. Shown are DAF-  
 167 16/FOXO<sup>12</sup>, SKN-1/NRF2<sup>13</sup>, PMK-1/p38 MAP kinase<sup>14</sup>, HSF-1/heat shock factor 1<sup>15</sup>,  
 168 HLH-30/TFEB<sup>16</sup>, HEL-1/DEAD-box RNA helicase<sup>17</sup>, histone H3.3<sup>18</sup>, MATH-  
 169 33/deubiquitylating enzyme (at 25°C)<sup>19</sup>, PFD-6/prefoldin<sup>620</sup>, RSKS-1/S6K<sup>21</sup>, SMG-



170 2/UPF1<sup>22</sup>, and SWSN-1/BAF155/170<sup>23</sup> target genes. **(b-c)** Genes upregulated **(b)** and  
171 downregulated **(c)** in *daf-2(-)* animals compared to various alleles of *daf-16* mutants in  
172 the *daf-2(-)* background were used for the analysis. Shown are data using *daf-*  
173 *16(mu86)*<sup>12</sup>, *daf-16(mu86)*<sup>a</sup>, *daf-16(mg54)*<sup>12</sup>, *daf-16(mg54)*<sup>a</sup>, *daf-16(mgDf50)*<sup>24</sup>, *daf-*  
174 *16(tm5030)*<sup>12</sup>, *daf-16(tm5032)*<sup>12</sup>, and *daf-16(tm6659)*<sup>12</sup>. Relative enrichment indicates  
175 the difference of gene expression changes caused by *daf-18(yh1)* or *daf-18(-)*. *q* values  
176 were obtained by calculating the false discovery rate corresponding to each normalized  
177 enrichment. <sup>a</sup>: GSE111338 in GEO. See Supplementary Table 2 for details.

## Supplementary Figure 8

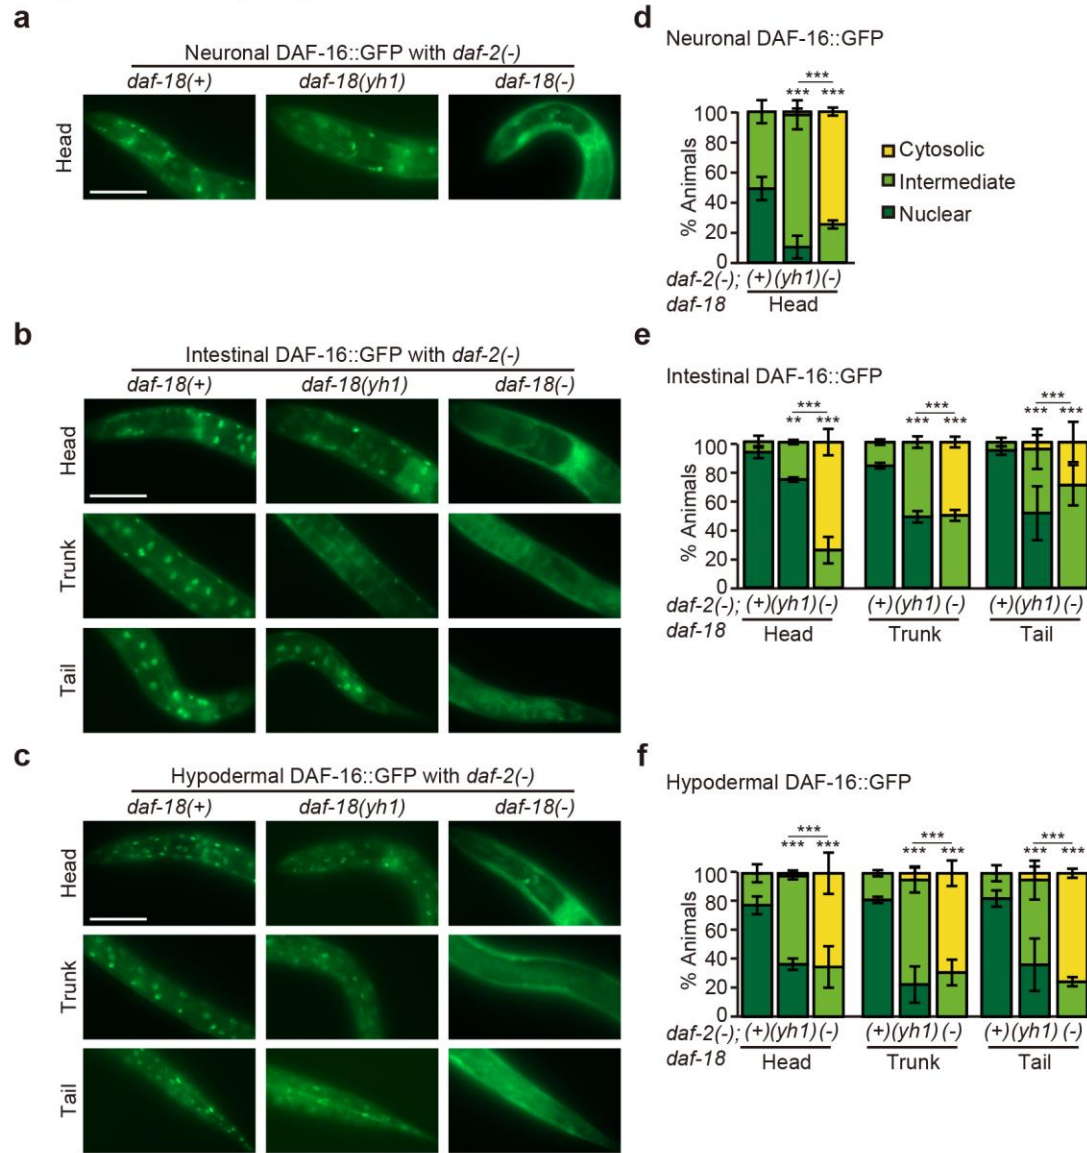

178 **Supplementary Fig. 8: *daf-18(yh1)* partially retains the nuclear localization of DAF-**  
 179 **16::GFP in various tissues of *daf-2(-)* mutants. (a-c)** Representative images of the  
 180 neuronal (a), intestinal (b), and hypodermal (c) DAF-16::GFP localization in head, trunk,  
 181 and tail regions of *daf-2(e1370)* [*daf-2(-)*], *daf-2(-); daf-18(yh1)*, and *daf-2(-); daf-*  
 182 *18(nr2037)* [*daf-18(-)*] animals. Scale bar: 50  $\mu$ m. (d-f) Quantification of data shown on  
 183 panels a-c. The subcellular localization of DAF-16::GFP was scored as follows. Nuclear:

184 predominant nuclear localization, intermediate: partial nuclear localization, cytosolic:  
185 predominant cytosolic localization ( $n \geq 31$  for each condition, from three independent  
186 trials). Error bars represent the standard error of mean (s.e.m.,  $**p < 0.01$ ,  $***p < 0.001$ ,  
187 Chi-squared test relative to WT unless otherwise noted). See also Source Data for data  
188 points used for the derivation of data.

## Supplementary Figure 9

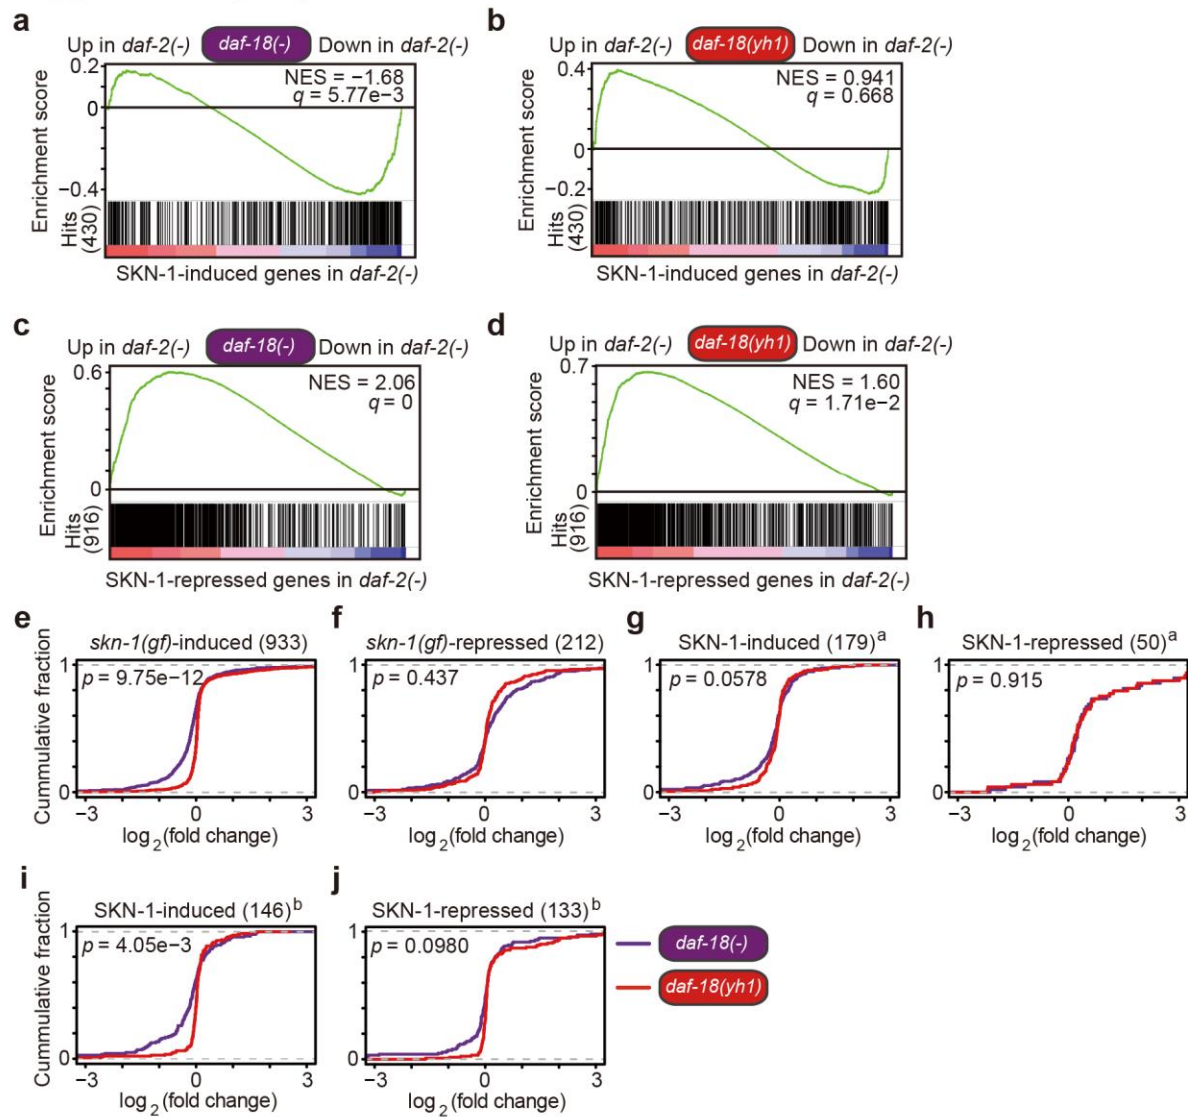

189 **Supplementary Fig. 9: DAF-18/PTEN downregulates SKN-1/NRF2 in animals with**  
 190 **reduced insulin/IGF-1 signaling. (a-d)** The extent of gene expression changes  
 191 conferred by *daf-18(yh1)* and *daf-18(nr2037)* [*daf-18(-)*] in *daf-2(e1370)* [*daf-2(-)*]  
 192 animals. Genes whose expression was upregulated (**a,b**) and downregulated (**c,d**) in  
 193 *daf-2(e1370)* [*daf-2(-)*] mutants compared to *daf-2(-)*; *skn-1(zu67)* mutants are shown.  
 194 Data using *daf-2(e1368)* and *daf-2(-)* mutants<sup>13</sup> were pooled. NES: normalized  
 195 enrichment score.  $q$  values were obtained by calculating the false discovery rate

196 corresponding to each NES. **(e-j)** Cumulative fraction of genes in an ascending order of  
197 the extent of gene expression changes conferred by *daf-18(yh1)* and *daf-18(-)* in wild-  
198 type animals. **(e,f)** Shown are genes whose expression was upregulated **(e)** and  
199 downregulated **(f)** in wild-type worms compared to *skn-1(lax188)* [*skn-1(gf)*] mutants<sup>25</sup>.  
200 **(g-j)** Genes whose expression was upregulated **(g,i)** and downregulated **(h,j)** in wild-  
201 type worms compared to the worms treated with *skn-1* RNAi are shown <sup>a: 26; b: 27</sup>. *p*  
202 values were calculated by using two-tailed paired permutation test.

## Supplementary Figure 10

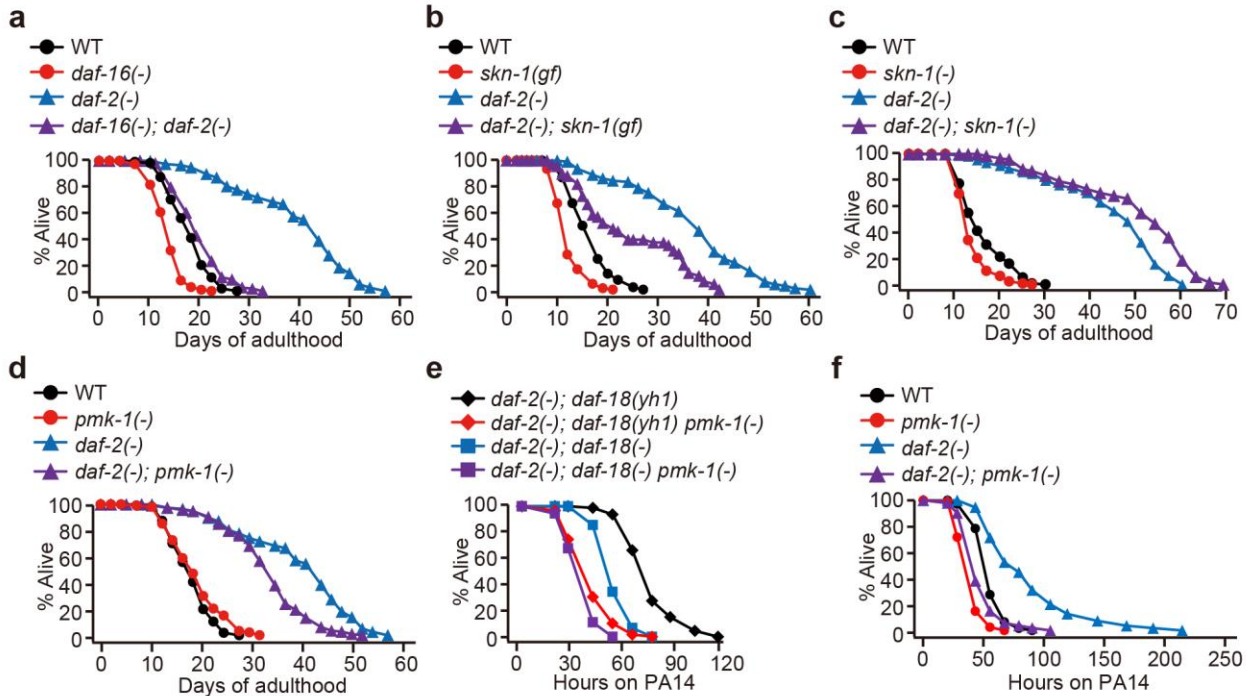

203 **Supplementary Fig. 10: Effects of *daf-16* RNAi, *skn-1(gf)*, *skn-1(-)*, and *pmk-1***  
 204 **RNAi on lifespan and pathogen resistance. (a-c)** Effects of *daf-16* RNAi [*daf-16(-)*] (n  
 205 = 120 for each condition) (a), *skn-1(lax188)* [*skn-1(gf)*] (n ≥ 295 for each condition) (b),  
 206 *skn-1(zj15)* [*skn-1(-)*] (n ≥ 270 for each condition) (c), and *pmk-1* RNAi [*pmk-1(-)*] (n =  
 207 120 for each condition) (d) on the lifespan of wild-type (WT) and *daf-2(e1370)* [*daf-2(-)*]  
 208 worms. Please note that we used *skn-1(zj15)*, a point mutation that causes mis-splicing  
 209 and reduces the mRNA levels of *skn-1*, because a strong *skn-1* mutant allele, *skn-*  
 210 *1(mg570)*, causes sickness and short lifespan<sup>28</sup>; indeed, we found that *mg570*  
 211 substantially increased vulval rupture phenotypes in worms: 6% in WT and 22% in *daf-*  
 212 *2(-); daf-18(nr2037)* [*daf-18(-)*] backgrounds. (e,f) The effects of *pmk-1* RNAi (n ≥ 108  
 213 for each condition) on the survival of *daf-2(-); daf-18(yh1)* and *daf-2(-); daf-18(-)* (e), and  
 214 WT and *daf-2(-)* worms (f) against PA14 infection. Although *daf-2(-); daf-18(-)* animals  
 215 displayed increased PMK-1 activity compared with *daf-2(-)* or *daf-2(-); daf-18(yh1)*

216 mutants shown in Fig. 5, reduced DAF-16/FOXO activity in *daf-2(-); daf-18(-)* animals  
217 may have decreased the survival of the worms on PA14. These results are consistent  
218 with a previous report showing that genetic inhibition of DAF-16/FOXO, which acts  
219 downstream of DAF-18/PTEN, increases PMK-1 target gene expression in *daf-2*  
220 mutants<sup>14</sup>. In contrast to lifespan results shown in Fig. 6d, we found that PMK-1 was  
221 required for the enhanced pathogen resistance of *daf-2(-)* and *daf-2(-); daf-18(yh1)*  
222 animals and for the normal survival of WT upon PA14 infection. Our data indicate that  
223 reducing the activity of PMK-1 can extend lifespan in *daf-2(-); daf-18(-)* animals, while  
224 decreasing immunity in these animals. These data are consistent with a previous report  
225 showing that lifespan and immunity can be regulated in opposite directions by one  
226 genetic factor<sup>29</sup>. See Supplementary Dataset 2 for statistical analysis and additional  
227 repeats for the data shown in this figure. See also Source Data for data points used for  
228 the derivation of data.

## 229 Supplementary References

- 230 1 Rodríguez-Escudero, I. *et al.* A comprehensive functional analysis of PTEN  
231 mutations: implications in tumor- and autism-related syndromes. *Hum Mol Genet*  
232 **20**, 4132-4142, doi:10.1093/hmg/ddr337 (2011).
- 233 2 Ailion, M. & Thomas, J. H. Dauer formation induced by high temperatures in  
234 *Caenorhabditis elegans*. *Genetics* **156**, 1047-1067 (2000).
- 235 3 Gil, E. B., Malone Link, E., Liu, L. X., Johnson, C. D. & Lees, J. A. Regulation of  
236 the insulin-like developmental pathway of *Caenorhabditis elegans* by a homolog  
237 of the *PTEN* tumor suppressor gene. *Proc Natl Acad Sci U S A* **96**, 2925-2930,  
238 doi:10.1073/pnas.96.6.2925 (1999).
- 239 4 Mihaylova, V. T., Borland, C. Z., Manjarrez, L., Stern, M. J. & Sun, H. The PTEN  
240 tumor suppressor homolog in *Caenorhabditis elegans* regulates longevity and  
241 dauer formation in an insulin receptor-like signaling pathway. *Proc Natl Acad Sci*  
242 *U S A* **96**, 7427-7432, doi:10.1073/pnas.96.13.7427 (1999).
- 243 5 Ogg, S. & Ruvkun, G. The *C. elegans* PTEN homolog, DAF-18, acts in the insulin  
244 receptor-like metabolic signaling pathway. *Mol Cell* **2**, 887-893,  
245 doi:10.1016/s1097-2765(00)80303-2 (1998).
- 246 6 Solari, F. *et al.* The human tumour suppressor PTEN regulates longevity and  
247 dauer formation in *Caenorhabditis elegans*. *Oncogene* **24**, 20-27,  
248 doi:10.1038/sj.onc.1207978 (2005).
- 249 7 *C. elegans* Deletion Mutant Consortium, large-scale screening for targeted  
250 knockouts in the *Caenorhabditis elegans* genome. *G3 (Bethesda)* **2**, 1415-1425,  
251 doi:10.1534/g3.112.003830 (2012).
- 252 8 Vowels, J. J. & Thomas, J. H. Genetic analysis of chemosensory control of dauer  
253 formation in *Caenorhabditis elegans*. *Genetics* **130**, 105-123 (1992).
- 254 9 Lin, K., Hsin, H., Libina, N. & Kenyon, C. Regulation of the *Caenorhabditis*  
255 *elegans* longevity protein DAF-16 by insulin/IGF-1 and germline signaling. *Nat*  
256 *Genet* **28**, 139-145, doi:10.1038/88850 (2001).
- 257 10 Ohno, H. *et al.* Role of synaptic phosphatidylinositol 3-kinase in a behavioral  
258 learning response in *C. elegans*. *Science* **345**, 313-317,  
259 doi:10.1126/science.1250709 (2014).
- 260 11 Larsen, P. L., Albert, P. S. & Riddle, D. L. Genes that regulate both development  
261 and longevity in *Caenorhabditis elegans*. *Genetics* **139**, 1567-1583 (1995).
- 262 12 Chen, A. T. *et al.* Longevity Genes Revealed by Integrative Analysis of Isoform-  
263 Specific *daf-16/FoxO* Mutants of *Caenorhabditis elegans*. *Genetics* **201**, 613-  
264 629, doi:10.1534/genetics.115.177998 (2015).
- 265 13 Ewald, C. Y., Landis, J. N., Porter Abate, J., Murphy, C. T. & Blackwell, T. K.  
266 Dauer-independent insulin/IGF-1-signalling implicates collagen remodelling in  
267 longevity. *Nature* **519**, 97-101, doi:10.1038/nature14021 (2015).
- 268 14 Troemel, E. R. *et al.* p38 MAPK regulates expression of immune response genes  
269 and contributes to longevity in *C. elegans*. *PLoS Genet* **2**, e183,  
270 doi:10.1371/journal.pgen.0020183 (2006).
- 271 15 Lee, Y. *et al.* Reduced insulin/IGF1 signaling prevents immune aging via ZIP-



272 10/bZIP-mediated feedforward loop. *J Cell Biol* **220**, doi:10.1083/jcb.202006174  
273 (2021).

274 16 Lin, X. X. *et al.* DAF-16/FOXO and HLH-30/TFEB function as combinatorial  
275 transcription factors to promote stress resistance and longevity. *Nat Commun* **9**,  
276 4400, doi:10.1038/s41467-018-06624-0 (2018).

277 17 Seo, M. *et al.* RNA helicase HEL-1 promotes longevity by specifically activating  
278 DAF-16/FOXO transcription factor signaling in *Caenorhabditis elegans*. *Proc Natl*  
279 *Acad Sci U S A* **112**, E4246-4255, doi:10.1073/pnas.1505451112 (2015).

280 18 Piazzesi, A. *et al.* Replication-Independent Histone Variant H3.3 Controls Animal  
281 Lifespan through the Regulation of Pro-longevity Transcriptional Programs. *Cell*  
282 *Rep* **17**, 987-996, doi:10.1016/j.celrep.2016.09.074 (2016).

283 19 Heimbucher, T. *et al.* The Deubiquitylase MATH-33 Controls DAF-16 Stability and  
284 Function in Metabolism and Longevity. *Cell Metab* **22**, 151-163,  
285 doi:10.1016/j.cmet.2015.06.002 (2015).

286 20 Son, H. G. *et al.* Prefoldin 6 mediates longevity response from heat shock factor  
287 1 to FOXO in *C. elegans*. *Genes Dev* **32**, 1562-1575,  
288 doi:10.1101/gad.317362.118 (2018).

289 21 Chen, D. *et al.* Germline signaling mediates the synergistically prolonged  
290 longevity produced by double mutations in *daf-2* and *rsks-1* in *C. elegans*. *Cell*  
291 *Rep* **5**, 1600-1610, doi:10.1016/j.celrep.2013.11.018 (2013).

292 22 Son, H. G. *et al.* RNA surveillance via nonsense-mediated mRNA decay is crucial  
293 for longevity in *daf-2*/insulin/IGF-1 mutant *C. elegans*. *Nat Commun* **8**, 14749,  
294 doi:10.1038/ncomms14749 (2017).

295 23 Riedel, C. G. *et al.* DAF-16 employs the chromatin remodeller SWI/SNF to  
296 promote stress resistance and longevity. *Nat Cell Biol* **15**, 491-501,  
297 doi:10.1038/ncb2720 (2013).

298 24 Kumar, N. *et al.* Genome-wide endogenous DAF-16/FOXO recruitment dynamics  
299 during lowered insulin signalling in *C. elegans*. *Oncotarget* **6**, 41418-41433,  
300 doi:10.18632/oncotarget.6282 (2015).

301 25 Nhan, J. D. *et al.* Redirection of SKN-1 abates the negative metabolic outcomes  
302 of a perceived pathogen infection. *Proc Natl Acad Sci U S A* **116**, 22322-22330,  
303 doi:10.1073/pnas.1909666116 (2019).

304 26 Oliveira, R. P. *et al.* Condition-adapted stress and longevity gene regulation by  
305 *Caenorhabditis elegans* SKN-1/Nrf. *Aging Cell* **8**, 524-541, doi:10.1111/j.1474-  
306 9726.2009.00501.x (2009).

307 27 Steinbaugh, M. J. *et al.* Lipid-mediated regulation of SKN-1/Nrf in response to  
308 germ cell absence. *Elife* **4**, doi:10.7554/eLife.07836 (2015).

309 28 Lehrbach, N. J. & Ruvkun, G. Proteasome dysfunction triggers activation of SKN-  
310 1A/Nrf1 by the aspartic protease DDI-1. *Elife* **5**, doi:10.7554/eLife.17721 (2016).

311 29 Amrit, F. R. G. *et al.* The longevity-promoting factor, TCER-1, widely represses  
312 stress resistance and innate immunity. *Nat Commun* **10**, 3042,  
313 doi:10.1038/s41467-019-10759-z (2019).

314 **Supplementary Tables**

315 **Supplementary Table 1. Molecular natures of mutant alleles identified from our**  
 316 **mutagenesis screen.**

| <b>Allele</b>     | <b>yh1</b>         | <b>yh2</b>               | <b>yh3</b>               |
|-------------------|--------------------|--------------------------|--------------------------|
| Gene              | <i>daf-18</i>      | <i>daf-16</i>            | <i>daf-16</i>            |
| Base change       | G to A             | C to T                   | G to A                   |
| Function          | C150Y              | Q115(STOP)               | Splice donor             |
| Isoforms affected | All                | <i>a/c/d/f/h/i/k/l/m</i> | <i>a/c/d/f/h/i/k/l/m</i> |
| Domain affected   | Phosphatase domain | Forkhead domain          | Forkhead domain          |

317

318 **Supplementary Table 2. References for multiple target genes in *daf-2* mutants that**  
 319 **were used for analysis in Fig. 5 and Supplementary Fig. 7.**

| <b>Genes</b>                 | <b>Strains</b>                                                                                                                                                                                                                                                                         | <b>Figure</b>                             | <b>Reference</b>                |                               |
|------------------------------|----------------------------------------------------------------------------------------------------------------------------------------------------------------------------------------------------------------------------------------------------------------------------------------|-------------------------------------------|---------------------------------|-------------------------------|
| DAF-16-<br>induced/repressed | <i>daf-2(e1370)</i> vs. <i>daf-16(mu86)</i> ; <i>daf-2(e1370)</i>                                                                                                                                                                                                                      | Fig. 5a and<br>Supplementary Fig.<br>7a,b | Chen <i>et al.</i> ,<br>2015    |                               |
|                              | <i>daf-2(e1370)</i> vs. <i>daf-16(mg54)</i> ; <i>daf-2(e1370)</i><br><i>daf-2(e1370)</i> vs. <i>daf-16(tm6659)</i> ; <i>daf-2(e1370)</i><br><i>daf-2(e1370)</i> vs. <i>daf-16(tm5032)</i> ; <i>daf-2(e1370)</i><br><i>daf-2(e1370)</i> vs. <i>daf-16(tm5030)</i> ; <i>daf-2(e1370)</i> | Supplementary Fig.<br>7b,c                |                                 |                               |
|                              | <i>daf-2(e1370)</i> vs. <i>daf-16(mu86)</i> ; <i>daf-2(e1370)</i><br><i>daf-2(e1370)</i> vs. <i>daf-16(mg54)</i> ; <i>daf-2(e1370)</i>                                                                                                                                                 | Supplementary Fig.<br>7b,c                |                                 | GSE111338 in<br>GEO           |
|                              | <i>daf-2(e1370)</i> vs. <i>daf-16(mgDf50)</i> ; <i>daf-2(e1370)</i>                                                                                                                                                                                                                    | Supplementary Fig.<br>7b,c                |                                 | Kumar <i>et al.</i> ,<br>2015 |
| SKN-1-<br>induced/repressed  | <i>daf-2(e1370)</i> vs. <i>daf-2(e1370)</i> ; <i>skn-1(zu67)</i><br><i>daf-2(e1368)</i> vs. <i>daf-2(e1368)</i> ; <i>skn-1(zu67)</i>                                                                                                                                                   | Fig. 5a and<br>Supplementary Fig.<br>7a   | Ewald <i>et al.</i> ,<br>2015   |                               |
| PMK-1-<br>induced/repressed  | <i>daf-2(e1368)</i> vs. <i>daf-2(e1368)</i> ; <i>pmk-1(km25)</i>                                                                                                                                                                                                                       | Fig. 5a and<br>Supplementary Fig.<br>7a   | Troemel <i>et al.</i> ,<br>2006 |                               |

|                                |                                                                                                        |                                   |                                 |
|--------------------------------|--------------------------------------------------------------------------------------------------------|-----------------------------------|---------------------------------|
| HSF-1-induced/repressed        | <i>daf-2(e1370)</i> vs. <i>hsf-1(RNAi)</i> ; <i>daf-2(e1370)</i>                                       | Fig. 5a and Supplementary Fig. 7a | Lee <i>et al.</i> , 2021        |
| HLH-30-induced/repressed       | <i>daf-2(e1370)</i> vs. <i>daf-2(e1370)</i> ; <i>hlh-30(tm1978)</i>                                    | Fig. 5a and Supplementary Fig. 7a | Lin <i>et al.</i> , 2018        |
| HEL-1-induced/repressed        | <i>daf-2(e1370)</i> vs. <i>hel-1(gk148684)</i> ; <i>daf-2(e1370)</i>                                   | Fig. 5a and Supplementary Fig. 7a | Seo <i>et al.</i> , 2015        |
| Histone H3.3-induced/repressed | <i>daf-2(e1370)</i> vs. <i>daf-2(e1370)</i> ; <i>his-72(tm2066)</i> ; <i>his-71(ok2289)</i>            | Fig. 5a and Supplementary Fig. 7a | Piazzesi <i>et al.</i> , 2016   |
| MATH-33-induced/repressed      | <i>daf-2(e1370)</i> vs. <i>daf-2(e1370)</i> ; <i>math-33(tm3561)</i> at 25°C (restrictive temperature) | Fig. 5a and Supplementary Fig. 7a | Heimbucher <i>et al.</i> , 2015 |
| PFD-6-induced/repressed        | <i>daf-2(e1370)</i> vs. <i>pf6-6(gk493446)</i> ; <i>daf-2(e1370)</i>                                   | Fig. 5a and Supplementary Fig. 7a | Son <i>et al.</i> , 2018        |
| RSKS-1-induced/repressed       | <i>daf-2(e1370)</i> vs. <i>daf-2(e1370)</i> ; <i>rsk-1(ok1255)</i>                                     | Fig. 5a and Supplementary Fig. 7a | Chen <i>et al.</i> , 2013       |
| SMG-2-induced/repressed        | <i>daf-2(e1370)</i> vs. <i>smg-2(qd101)</i> ; <i>daf-2(e1370)</i>                                      | Fig. 5a and Supplementary Fig. 7a | Son <i>et al.</i> , 2017        |
| SWSN-1-induced/repressed       | <i>daf-2(e1370)</i> vs. <i>daf-2(e1370)</i> ; <i>swn-1(os22)</i>                                       | Fig. 5a and Supplementary Fig. 7a | Riedel <i>et al.</i> , 2013     |
